# Supplementary material for: The THERMOSENSITIVE MALE STERILE 1 Interacts with the BiPs via DnaJ Domain and Stimulates Their ATPase Enzyme Activities in Arabidopsis
Source: PLoS One. 2015 Jul 17;10(7):e0132500. doi: 10.1371/journal.pone.0132500 (PMC4505944; doi:10.1371/journal.pone.0132500)
Supplement: S1 Table — (DOC) [file pone.0132500.s002.doc]

**Supplemental Tables**

**S1 Table. The primers used in this study**

| Used for | Genes | Names or Directions | Sequences (5’- 3’) |
| --- | --- | --- | --- |
| T-DNA insertion assays | T-DNA | Lba1 | TGGTTCACGTAGTGGGCCATCG |
| *bZIP28* | P1 | CCTTATGTTCATCGTAATAC |
| P2 | ATGACGGAATCAACATCCG |
| *bZIP60* | P3 | TAGCCACAGCATCATCGTC |
| P4 | atgttgacggtgacaaagag |
| Real-time PCR assays | *ACTIN2* | Forward | GGTAACATTGTGCTCAGTGGTGG |
| Reverse | AACGACCTTAATCTTCATGCTGC |
| *TMS1* | Forward | AAAAGCTTCTGCCAGGAACA |
| Reverse | TTGCCGGAAACTTGTCTACC |
| *bZIP60* | Forward | TCCGGCGGAGGATTTTCTTCA |
| Reverse | GCCAAATCAACGGAGCCAGA |
| *bZIP28* | Forward | TGAGGAGATCGGTAACAATCG |
| Reverse | CAGAAGATTTCTGGTGATTGC |
| *BiP1* | Forward | TAAGAAGGGTGGCGAGAAGA |
| Reverse | CACCCTGTGGTCAAAGTCCT |
| *BiP3* | Forward | GGAGAAGCTTGCGAAGAAGA |
| |  | | --- |   Reverse | ATAACCGGGTCACAAACCAA |
| *TIN1* | Forward | TGATGTGGATGCTGGTGTTT |
| Reverse | TTGATCAGTCGAAGCACGTC |
| *ERDJ3B* | Forward | GAAGGGATGGCAACGATCTA |
| Reverse | GAGGTTGCCTTTCTTTGTGC |

**Table S1.** The primers used in this study (continued)

| Used for | Genes | Names or Directions | Sequences (5’- 3’) |
| --- | --- | --- | --- |
| LUC assays | *BiP1* | Forward | GGGTACCGCAATAGAAGAGGCTACGAA |
| Reverse | GTCGACGAGCTCATCGTGAGACTCATC |
| *BiP3* | Forward | GGGTACCGAAGGCGAAGAGCAGAAACT |
| Reverse | GTCGACTAACTCATCGTGATCATCT |
| DnaJ Domain of *TMS1* | Forward | GGGTACCGATCCTTACAAGGTTCTTGG |
| Reverse | CGGATCCATCAGATAAGATCTCATACG |
| *TMS1* | Forward | GGGTACCGATCCTTACAAGGTTCTTGG |
| Reverse | CGGATCCTCATTTGATCTGGGGTTTCT |
| *TIN1* | Forward | GGGTACCTTAATTTCGTCTCCTGATGC |
| Reverse | GCGAGCTCTTAATTTCGTCTCCTGATGC |
| Production of recombinant proteins | *BiP1* | Forward | CGAATTCGCAATAGAAGAGGCTACGAA |
| Reverse | CCGCTCGAGCTAGAGCTCATCGTGAGACT |
| *BiP3* | Forward | CGAATTCGAAGGCGAAGAGCAGAAACT |
| Reverse | CCTCGAGGTAACTCATCGTGATCATCTC |
| DnaJ Domain of *TMS1* | Forward | CCGGAATTCGATCCTTACAAGGTTCTTGGA |
| Reverse | CCGCTCGAGTCAATGGTGGTGATGATGGTG  ATCAGATAAGATCTCATACG |
| *DnaJ-TB* mutant | Forward | CTCTGAAATATCAGCCAGATAAAAACAAAG |
| Reverse | CTTTGTTTTTATCTGGCTGATATTTCAGAG |
|  |  |  |  |
